# Supplementary material for: Inflammatory cytokines and organ dysfunction associate with the aberrant DNA methylome of monocytes in sepsis
Source: PubMed Central journal article supplement (PMC6820973; doi:10.1186/s13073-019-0674-2), 2019-10-29

**Figure S2**

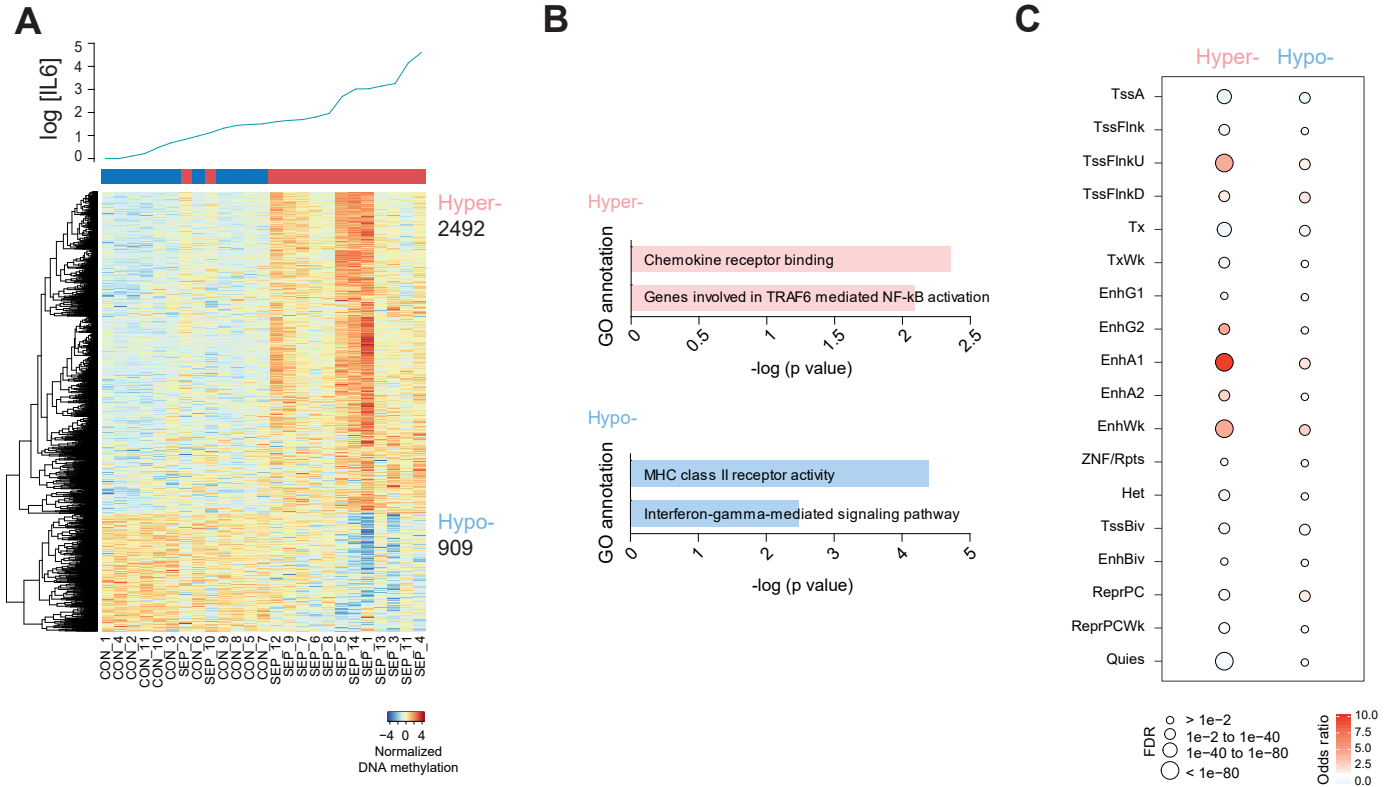

**D**

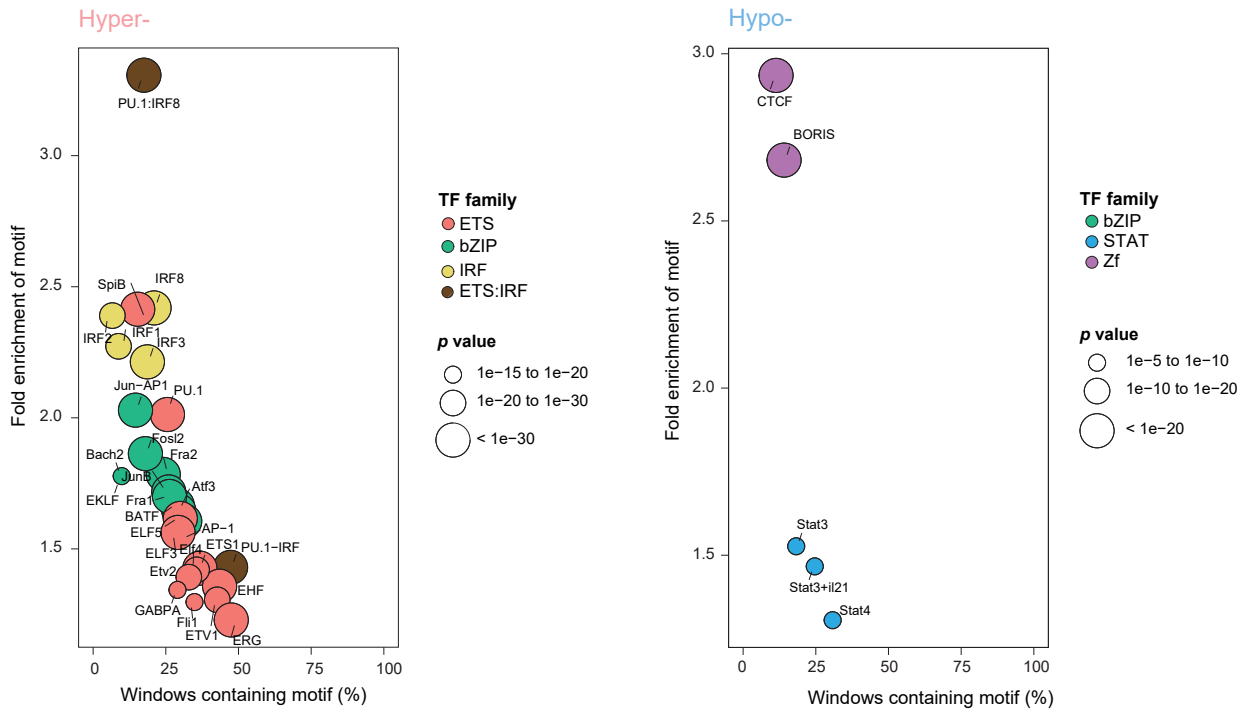

Supplement: 13073_2019_674_MOESM7_ESM.pdf [file 13073_2019_674_MOESM7_ESM.pdf]
